# Supplementary material
Source: publisher site journal article supplement (https://www.dovepress.com/article/134969)

| Name         | Band ID                   | Cage # | Sex | 7/18/11 | 8/17/11 | 9/23/11 | 10/18/11 |
|--------------|---------------------------|--------|-----|---------|---------|---------|----------|
| Doyle        | L gold LG 08 25           | 2      | M   |         |         |         |          |
| Hammett (T   | R gold 23P 08 03          | 2      | M   |         |         | +       |          |
| Valentino    | L red 23P 07 16           | 3      | M   |         |         | +       |          |
| Baby 3       | R orange 23P 11 303       | 6      | ?   |         |         |         |          |
| Baby 8       | R orange 23P 11 308       | 6      | ?   |         | +       |         |          |
| Alexei (Pet  | L black AAA2494           | 7      | M   |         |         |         |          |
| Baby 10      | R orange 23P 11 310       | 7      | ?   |         |         | +       | +        |
| Shakespear   | L silver 23P 09 107       | 7      | M   |         |         |         |          |
| WF Grey      | L red 10486 07 104        | 7      | ?   | +       |         | +       |          |
| Baby 1       | R orange 23P 11 301       | 8      | ?   |         |         |         |          |
| Niblet (& G  | R red 91J 07 04           | 8      | M   |         |         | +       |          |
| Ulysses (Ma  | R silver 23P 09 125       | 8      | M   |         |         | +       |          |
| James (Tux   | R gold 23P 08 08          | 9      | M   |         |         | +       |          |
| Piper's Son  | R green 23P 10 209        | 9      | M   |         |         | +       |          |
| Shea         | R silver 3H0308           | 9      | M   |         |         | +       |          |
| Aurum        | L red 16P 07 47           | 10     | M   |         |         |         |          |
| Lampchop     | L red 64S 07 165          | 10     | M   |         |         |         |          |
| Tuxedo       | R silver 4DW NCS 9864     | 10     | M   |         |         | +       |          |
| Baby 2       | R orange 23P 11 302       | 11     | ?   |         |         |         |          |
| Nellie (Geo  | R gold 23P 08 16          | 11     | F   |         |         |         |          |
| Karma (goo   | L red 64S 07 160          | 11     | F   |         |         |         |          |
| Clancy (rare | R gold 23P 08 25          | 12     | M   |         |         |         |          |
| Mouse        | R gold 23P 08 04          | 12     | F   |         |         |         |          |
| Apollo (fat  | L blue 64S 06 110         | 13     | M   |         |         |         |          |
| Cassanova    | L orange 54R 05 52        | 13     | M   |         |         | +       |          |
| Gawaine (s   | R gold 23P 08 02          | 13     | M   |         |         | +       |          |
| Hawk (fant   | R orange 40A 05 5004      | 13     | M   |         |         | +       |          |
| Elizabeth (M | R red 4M 07 57            | 14     | F   |         |         |         |          |
| Geordi (Dac  | L orange 16P 99 186       | 14     | M   |         |         |         |          |
| Jaal         | L red 25J 07 24           | 15     | F   |         |         |         |          |
| Juliette     | R orange 70L 05 548       | 15     | F   |         |         |         |          |
| Manilow (s   | L orange 70L 05 532       | 15     | M   |         |         |         |          |
| Piper (son   | L silver 23P 09 104       | 15     | M   |         |         |         |          |
| Baby 7 Lou   | R orange 23P 11 307       | 16     | ?   | +       |         |         |          |
| Josephine    | R blue 36L 06 87 (No band | 16     | F   |         | +       |         |          |
| Lucy M       | L gold 2704E121           | 16     | F   |         | +       |         |          |
| Tolstoy (Ma  | L silver 23P 09 111       | 16     | M   |         |         |         |          |
| Baby 4       | R orange 23P 11 304       | 17     | ?   |         |         |         |          |
| Baby 6       | R orange 23P 11 306       | 17     | ?   |         |         |         |          |
| Dorothy      | R blue 36L 06 88          | 17     | F   |         |         | +       |          |
| Mimi         | L gold 25J 08 12          | 17     | F   |         |         |         |          |
| Frost (Geor  | R silver 23P 09 123       | 18     | F   |         |         |         |          |
| Honey        | L green 64S 04 56         | 18     | F   |         |         |         |          |
| Mozart (go   | L silver 40W 09 902       | 18     | M   |         |         |         |          |
| Nutmeg       | R gold 62C NCS 02 17      | 18     | F   |         |         | +       |          |
| ** no name   | L silver 70L0404          |        | F   |         | +       | 9/16/11 |          |
| ****no nar   | L white 23                |        | M   |         |         |         |          |

|                                                |                                      |   |         |         |         |          |
|------------------------------------------------|--------------------------------------|---|---------|---------|---------|----------|
| ***no name                                     | L green 36L 10 220                   | F |         |         |         |          |
| *no name f                                     | L red 34K 07 05                      | F |         | +       | 8/22/11 |          |
| Achilles                                       | R silver 23P 09 129                  | F |         |         |         |          |
| Agatha                                         | Left white 24                        | F |         | +       |         |          |
| Bobo                                           | R purple MEL28                       | M | +       | +       | +       | +        |
| Camelot                                        | R gold 23P 08 01                     | M |         | +       | +       | +        |
| Captain (M)                                    | R silver 23P 09 121                  | M |         |         |         |          |
| Chouette (r)                                   | R blue SON 361 06 108                | F |         |         |         |          |
| Christie (Ge)                                  | R gold 23P 08 17                     | F |         |         |         |          |
| Dante                                          | L green 36L 04 25                    | M | 1       | +       | +       | +        |
| Elaine                                         | R gold 23P 08 05                     | F |         | +       |         |          |
| Gift                                           | R red 46N 07 188                     | F |         |         |         |          |
| Jane                                           | L green 70L 10 02                    | F |         |         |         |          |
| Johanna (G)                                    | R gold 23P 08 12                     | F |         |         | +       |          |
| Luti                                           | L white 21                           | F |         |         | +       |          |
| Melville (G)                                   | R gold 23P 08 13                     | M |         |         |         |          |
| Poe (Camel)                                    | R green 23P 10 207 L green 42F 10 10 | M |         |         | +       |          |
| Prize (daug)                                   | R green 23P 10 205                   | F |         |         |         |          |
| Twilight (ra)                                  | L blue 40P 06 64                     | M |         |         | +       |          |
| Band ID                                        |                                      |   | 7/18/11 | 8/17/11 | 9/23/11 | 10/18/11 |
| Total number tested                            |                                      |   | 65      | 66      | 64      | 64       |
| Number Positive                                |                                      |   | 6       | 10      | 22      | 4        |
| Percent testing positive at this specific date |                                      |   | 9%      | 15%     | 34%     | 6%       |

|                                                                                     |                               |
|-------------------------------------------------------------------------------------|-------------------------------|
|  | never sheds                   |
|  | shed once                     |
|  | sheds multiple times          |
|  | consistent heavy shedder      |
|  | dead                          |
|  | Swab results yet to be tested |



| 11/6/11  |          |         |         |           |         |         |         |         |         |  |
|----------|----------|---------|---------|-----------|---------|---------|---------|---------|---------|--|
|          |          |         |         |           |         | +       |         |         |         |  |
|          |          |         |         |           |         |         |         |         |         |  |
| +        | +        | +       | +       | 2/29/2012 |         |         |         |         |         |  |
| +        | +        | +       | +       | +         | +       | +       | +       | +       | +       |  |
|          |          |         | +       |           |         | +       |         |         |         |  |
| +        | +        | +       | +       | 3/7/2012  |         |         |         |         |         |  |
|          |          |         |         | +         | ?       |         |         |         |         |  |
|          |          |         |         |           | +       | +       |         |         |         |  |
|          |          |         |         |           |         |         |         |         |         |  |
|          |          |         |         |           | +       |         |         |         |         |  |
|          |          |         |         |           |         |         |         |         |         |  |
|          | +        |         |         |           |         |         |         |         |         |  |
|          |          |         |         |           |         |         |         |         |         |  |
|          |          |         |         |           |         | +       |         |         |         |  |
|          |          |         |         |           |         |         |         |         |         |  |
|          |          |         |         |           |         |         |         |         |         |  |
|          |          |         |         |           |         |         |         |         |         |  |
|          |          |         |         |           |         | +       |         |         |         |  |
|          |          |         |         |           |         |         |         | +w      |         |  |
|          |          |         |         |           |         |         |         |         |         |  |
| 11/17/11 | 12/20/11 | 1/26/12 | 2/21/12 | 3/20/12   | 4/18/12 | 5/18/12 | 6/27/12 | 7/25/12 | 8/23/12 |  |
| 63       | 63       | 63      | 62      | 60        | 59      | 60      | 63      | 65      | 65      |  |
| 7        | 5        | 6       | 5       | 7         | 21      | 4       | 3       | 1       |         |  |
| 11%      | 8%       | 10%     | 8%      | 10%       | 36%     | 7%      | 5%      | 2%      |         |  |

9/18/12

11/14/2012

1/29/13

2/4/13

2/11/13

2/25/13

3/1/13

3/11/13

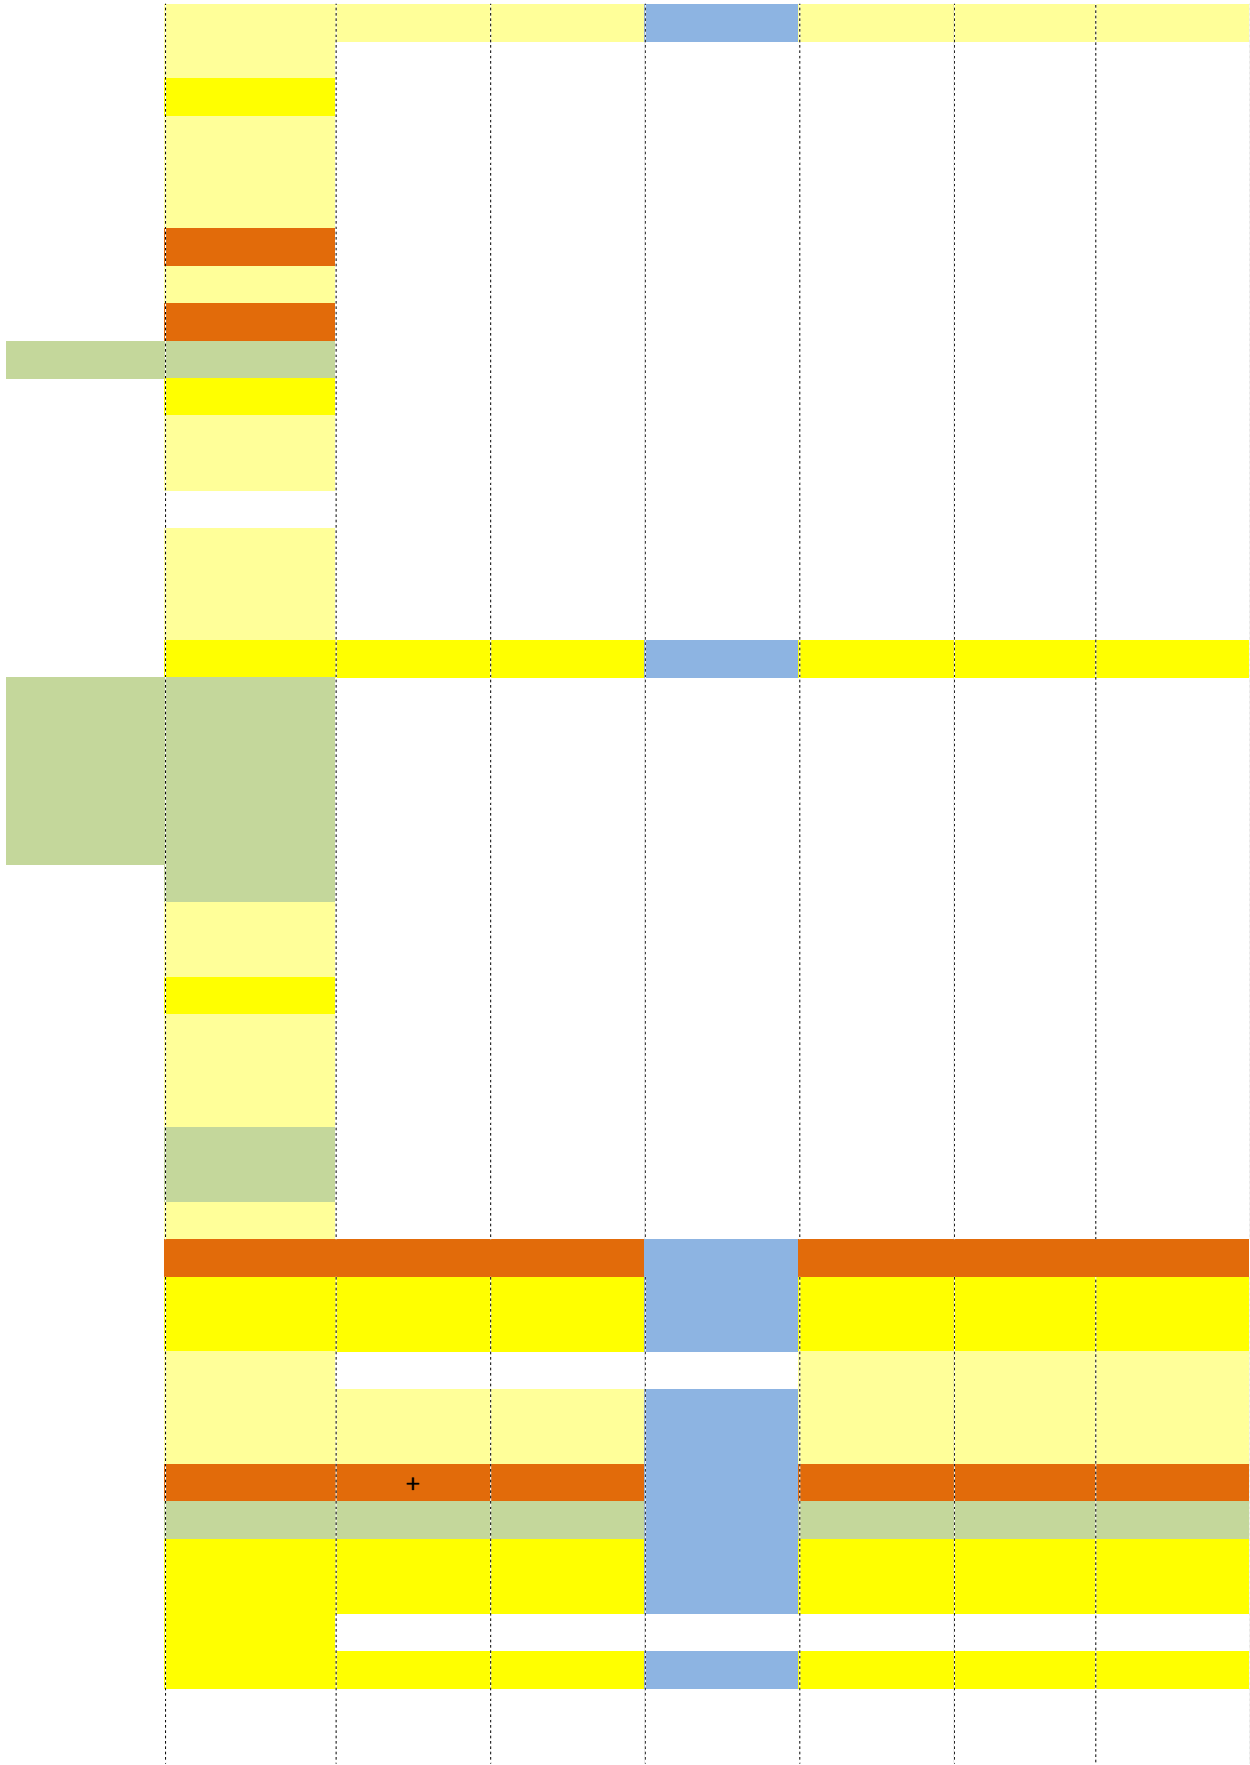

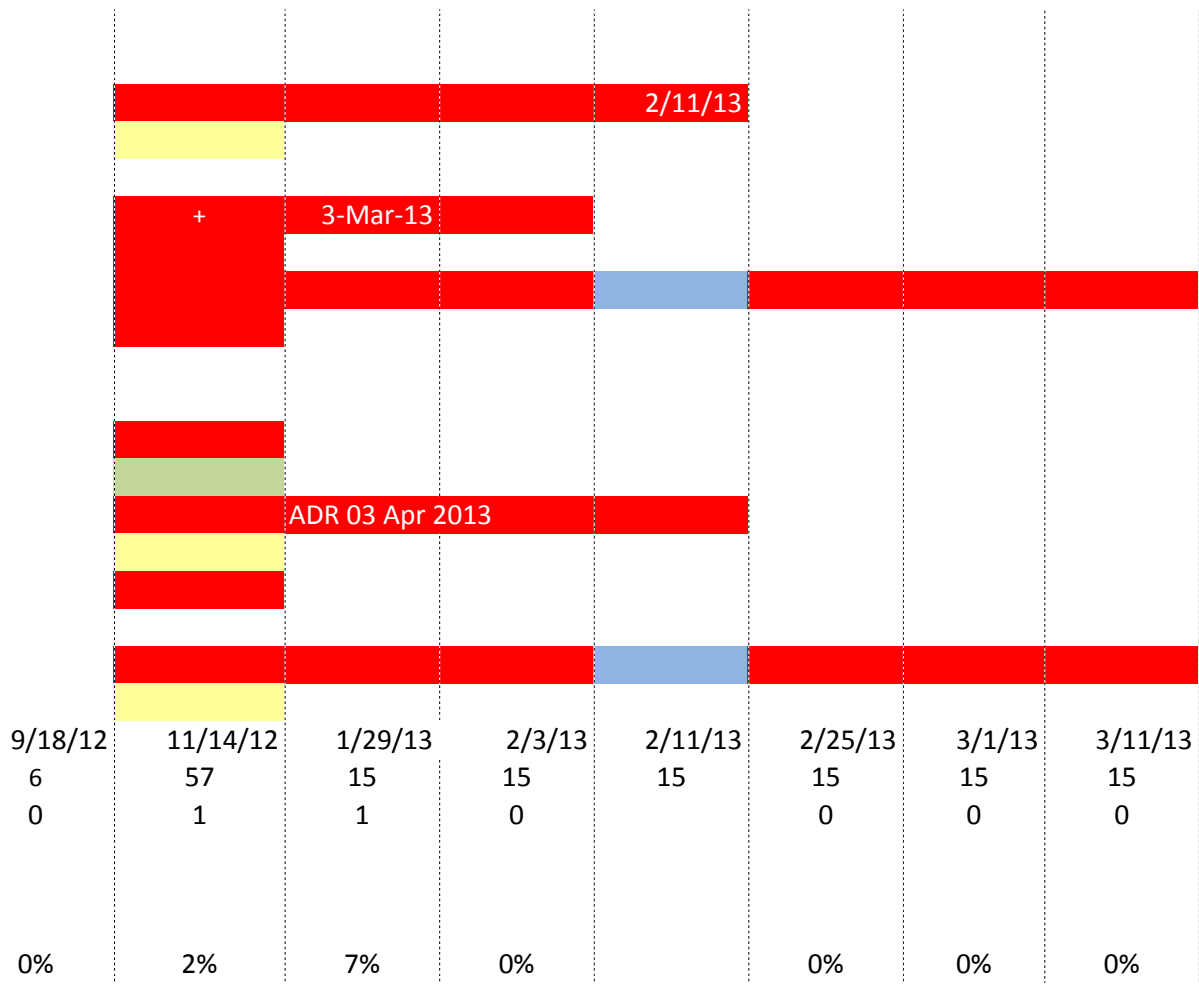



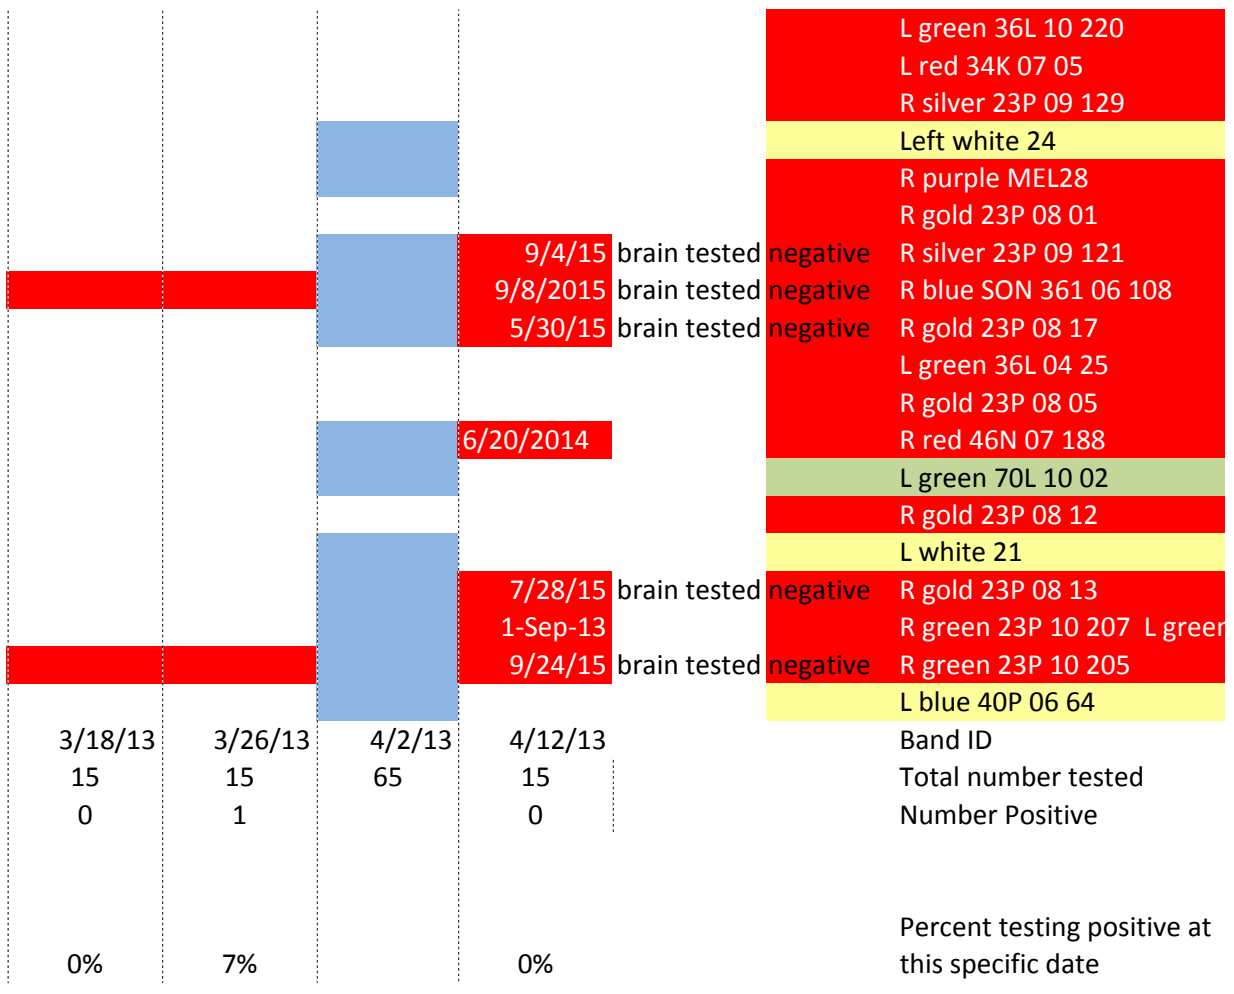

Supplement: Supplementary file 1 [file get_supplementary_file.php]
